# Supplementary material for: Sacrificial carbonaceous coating over alumina supported Ni–MoS2 catalyst for hydrodesulfurization
Source: Royal Society of Chemistry journal article supplement (doi:10.1039/c9ra00884e), 2019-01-01
Supplement: c9ra00884e1.pdf [file c9ra00884e1.pdf]

**Electronic Supplementary Information**  
**for**  
**Sacrificial Carbonaceous Coating over Alumina Supported Ni-**  
**MoS<sub>2</sub> Catalyst for Hydrodesulfurization**

Yingrui Xu,<sup>a</sup> Pengyun Li,<sup>a</sup> Shenghua Yuan,<sup>b</sup> Baokuan Sui,<sup>b</sup> Weikun Lai,<sup>\*a</sup> Xiaodong Yi,<sup>\*a</sup> and Weiping Fang<sup>a</sup>

---

<sup>a</sup> *National Engineering Laboratory for Green Chemical Productions of Alcohols- Ethers-Esters, College of Chemistry and Chemical Engineering, Xiamen University, Xiamen 361005, China. E-mail: [xdyi@xmu.edu.cn](mailto:xdyi@xmu.edu.cn), [laiweikun@xmu.edu.cn](mailto:laiweikun@xmu.edu.cn).*

<sup>b</sup> *SINOPEC Dalian Research Institute of Petroleum and Petrochemical, Dalian 116045, China.*

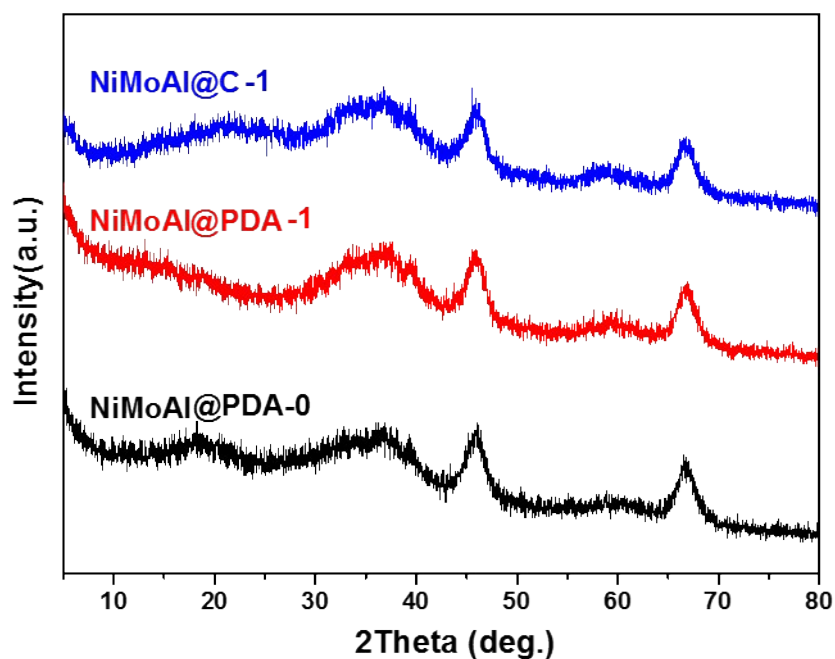

**Fig. S1** XRD patterns of NiMoAl@PDA-0, NiMoAl@PDA-1 and NiMoAl@C-1 Samples.

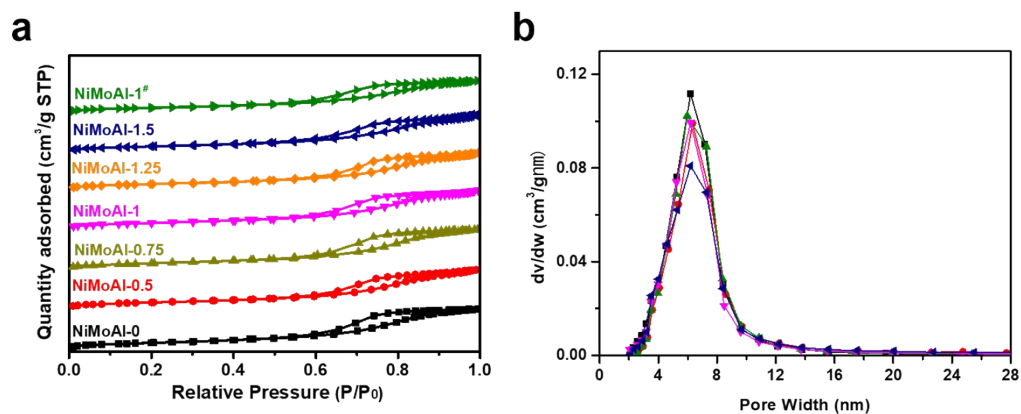

**Fig. S2** Nitrogen adsorption-desorption isotherms (a) and pore size distributions (b) of the catalysts.

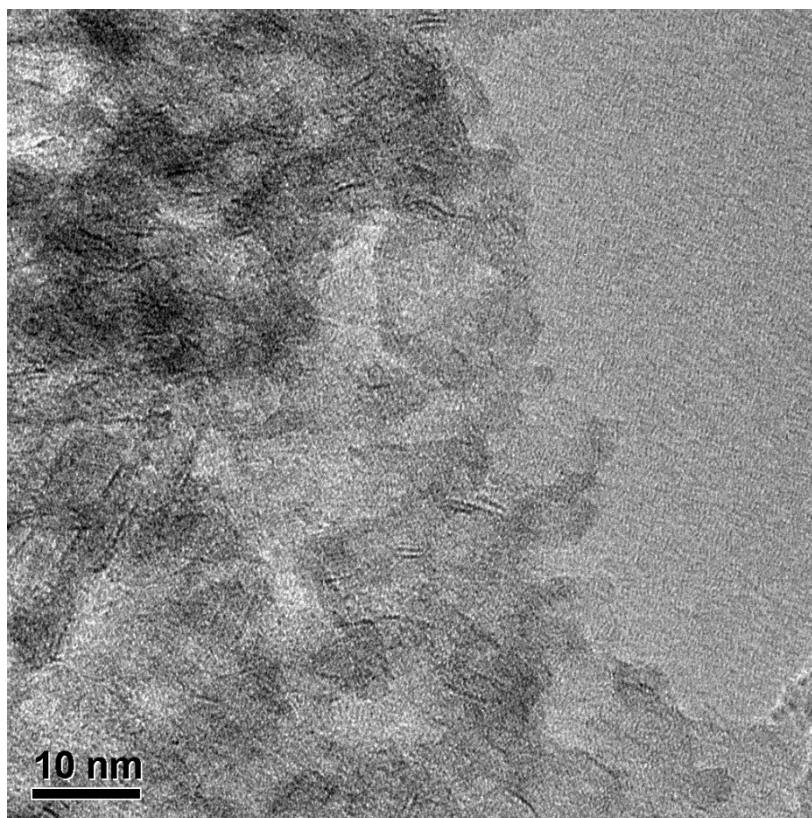

Fig. S3 Typical HRTEM images of the sulfided NiMoAl-1# catalyst.

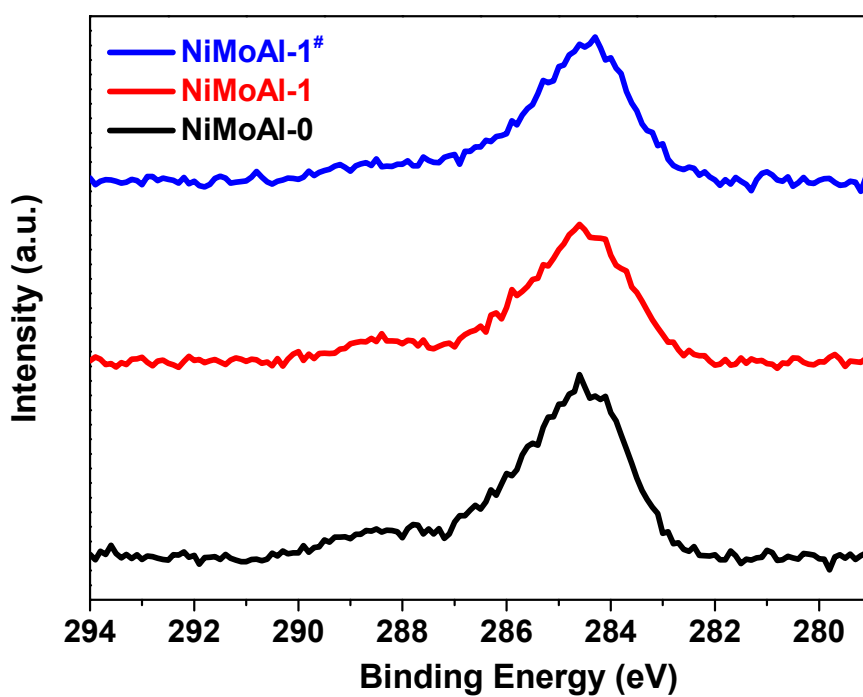

Fig. S4 C 1s spectra of NiMoAl-0, NiMoAl-1 and NiMoAl-1#.

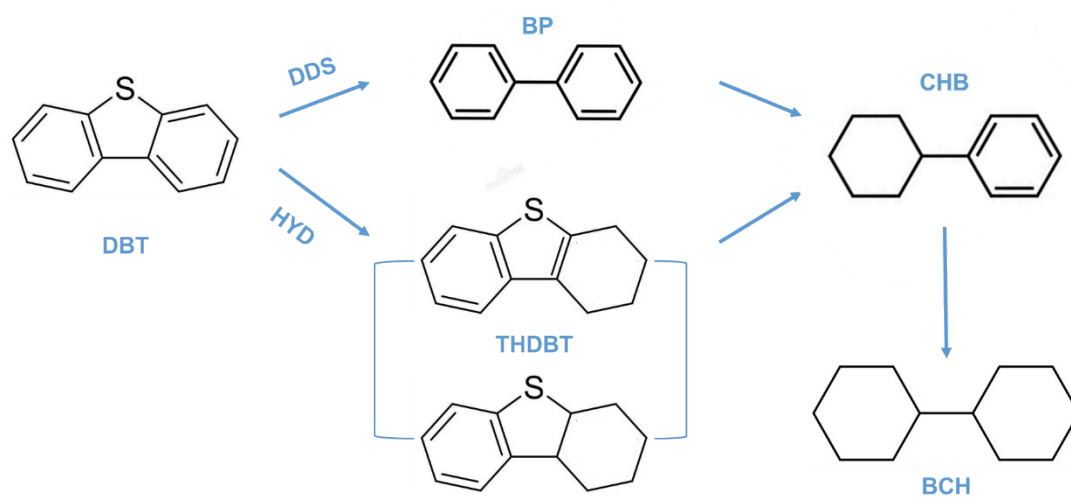

**Scheme S1** Proposed reaction network of DBT over HDS catalysts through DDS (direct desulfurization) and HYD (hydrodesulfurization) pathways. BP: biphenyl; THDBT: tetrahydrodibenzothiophene; CHB: cyclohexylbenzene; BCH: bicyclohexyl.

**Table S1** Weight losses at different temperature ranges of the NiMoAl-x precursors.

| Catalysts  | Weight Loss (%) |            |            |
|------------|-----------------|------------|------------|
|            | 40~140 °C       | 140~400 °C | 400~700 °C |
| NiMoAl-0   | 5.87            | 6.4        | 4.3        |
| NiMoAl-0.5 | 3.60            | 11.1       | 5.5        |
| NiMoAl-1   | 3.80            | 12.1       | 8.1        |
| NiMoAl-1.5 | 4.64            | 13.8       | 9.6        |
| NiMoAl@C   | 4.03            | 12.1       | 7.8        |
| NiMoAl@PDA | 3.37            | 13.2       | 8          |
